# Supplementary material
Source: PubMed Central journal article supplement (PMC2874607)
Supplement: NIHMS189905-supplement-1_si_001.pdf [file NIHMS189905-supplement-1_si_001.pdf]

# **Supporting Information for**

## **Rescue of glaucoma-causing mutant myocilin thermal stability by chemical chaperones**

### **SUPPLEMENTAL METHODS**

**Disulfide bond characterization.** The oxidation state of the two cysteines in OLFs was determined by utilizing a fluorogenic thiol-modifying reagent, ThioGlo® 1 (Calbiochem). A stock solution of ThioGlo® 1 was prepared by dilution in dimethylsulfoxide to a final concentration of 10 mM. ThioGlo® 1 was further diluted to 20  $\mu$ M in Buffer B, along with 1-2  $\mu$ M OLF with and without 5 mM tris(2-carboxyethyl)phosphine HCl (TCEP; Thermo Scientific). Fluorescence emission spectra of cysteine–ThioGlo® 1 protein adducts were recorded using excitation and emission wavelengths of 379 and 513 nm respectively, using a Shimadzu RF-5301 PC spectrofluorophotometer. The ThioGlo® 1 only or ThioGlo® 1 plus TCEP scans were subtracted from those of the OLF-containing protein samples. The assay was conducted in triplicate.

**Circular Dichroism (CD).** Prior to CD scans, monomeric MBP-OLF samples were purified once more on an analytical Superdex 75 gl column (GE Healthcare) to remove all traces of aggregate or MBP and then concentrated to 0.25-0.5  $\mu$ M. CD spectra were acquired at 25 °C on a Jasco J-810 CD spectropolarimeter. Twenty consecutive scans ranging from 200 nm to 300 nm, using a bandwidth of 1 nm at a continuous scanning rate of 500 nm/min, were averaged for each sample.

## SUPPLEMENTAL FIGURES AND TABLES:

| Sample                  | Fluorescence intensity (513 nm) |
|-------------------------|---------------------------------|
| Cleaved MYOC-OLF        | $0.5 \pm 0.3$                   |
| Cleaved MYOC-OLF + TCEP | $55.7 \pm 2.6$                  |
| MBP-OLF                 | $0.9 \pm 0.1$                   |
| MBP-OLF + TCEP          | $46.6 \pm 3.1$                  |
| MBP-OLF(D380A)          | $0.9 \pm 0.2$                   |
| MBP-OLF(D380A) + TCEP   | $45.0 \pm 2.0$                  |
| MBP-OLF(I477S)          | $0.7 \pm 0.4$                   |
| MBP-OLF(I477S) + TCEP   | $60.9 \pm 1.9$                  |
| MBP-OLF(I477N)          | $1.5 \pm 0.3$                   |
| MBP-OLF(I477N) + TCEP   | $71.9 \pm 1.5$                  |
| MBP-OLF(K423E)          | $0.6 \pm 0.2$                   |
| MBP-OLF(K423E) + TCEP   | $60.5 \pm 2.8$                  |

**Supplemental Table S1** Characterization of disulfide bonds in OLF-containing proteins in this study. The thiol-modifying reagent ThioGlo® 1 only reacts with OLF-containing proteins when the reducing agent TCEP is added. Thus, OLF retains the single disulfide bond in all proteins characterized.

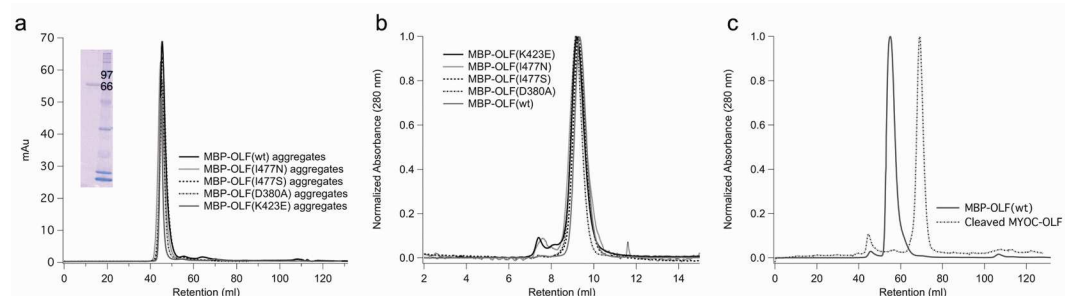

**Supplemental Figure S1.** Characterization of OLF and mutants by gel filtration. (a) Aggregates purified as in *Methods* that are reloaded onto preparative Superdex 75 column do not disaggregate into monomers. Inset: Fractionation of aggregates on SDS-PAGE under reducing conditions yields monomer MBP-OLF (~ 72 kDa). Right: molecular mass markers (kDa). (b) MBP-OLF monomers purified as in *Methods* that are reloaded onto analytical Superdex 75 column do not equilibrate to aggregates to any appreciable extent. (c) MBP-OLF(wt) and cleaved MYOC-OLF incubated at 4 °C for over a month do not aggregate to any appreciable extent.

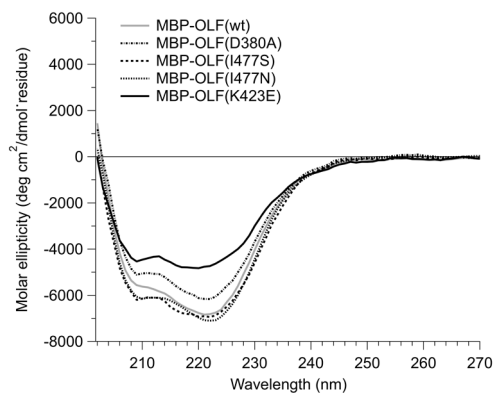

**Supplementary Figure S2.** Characterization of MBP-OLF and mutants by CD. Overall, the shapes of the mutants are similar to MBP-OLF(wt), exhibiting a mixture of  $\alpha$ -helical and  $\beta$ -sheet signatures expected of the fusion protein. Changes in intensity indicate some local perturbations, however.
